# Supplementary material for: HCV microelimination in harm reduction centres has benefits beyond HCV cure but is hampered by high reinfection rates
Source: PubMed Central journal article supplement — JHEP Rep. 2022 Sep 13;4(12):100580. doi: 10.1016/j.jhepr.2022.100580 (PMC9617206; doi:10.1016/j.jhepr.2022.100580), 2022-09-13
Supplement: mmc1.pdf [file mmc1.pdf]

# **HCV microelimination in harm reduction centres has benefits beyond HCV cure but is hampered by high reinfection rates**

Sabela Lens, Anna Miralpeix, Mont Gálvez, Elisa Martró, Noemi González,  
Sergio Rodriguez-Tajes, Zoe Mariño, Verónica Saludes, Juliana Reyes-Urueña,  
Xavier Majó, Joan Colom, Xavier Forns

## Table of contents

|               |   |
|---------------|---|
| Fig. S1.....  | 2 |
| Fig. S2.....  | 3 |
| Table S1..... | 4 |
| Table S2..... | 4 |
| Table S3..... | 5 |
| Table S4..... | 5 |

**Fig. S1. Treatment Adherence**

Each row represents one patient. Each column is a treatment day (green=dose taken; orange=missed dose). Dashed lines indicate planned treatment duration for 8-week therapies (56 days, top) or 12-week therapies (84 days, bottom). Treatment outcomes are shown in X axis. (SVR: sustained virological response, FU: follow-up).

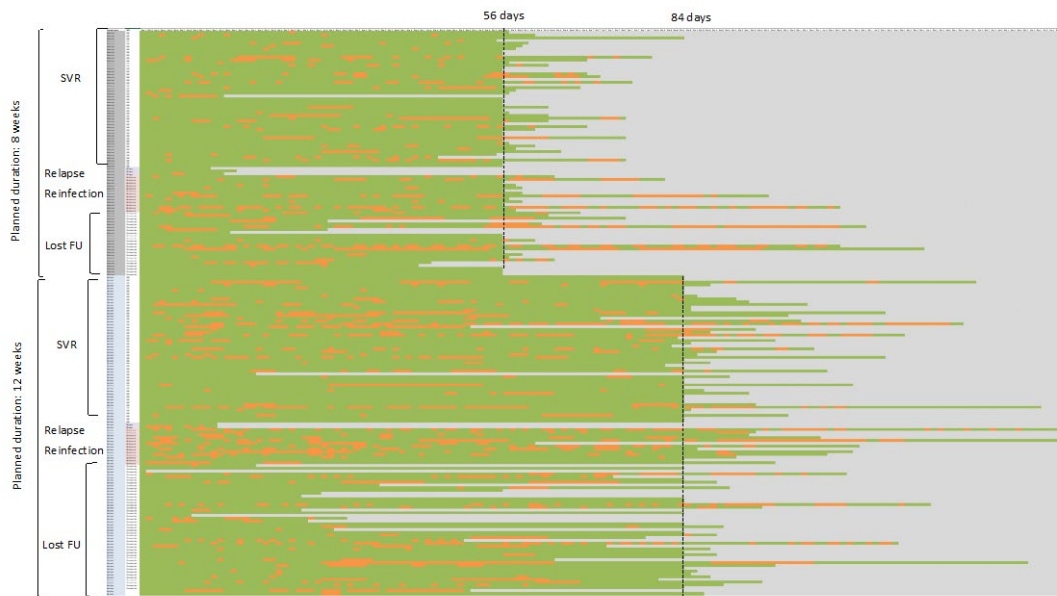

**Fig. S2. Outcomes after reinfection**

Description of reinfections during follow-up (FU) with genotypes and outcomes after reinfection (lost to follow-up after first treatment, re-treatment with sustained virological control (SVR), new reinfection or lost to follow-up after re-treatment)

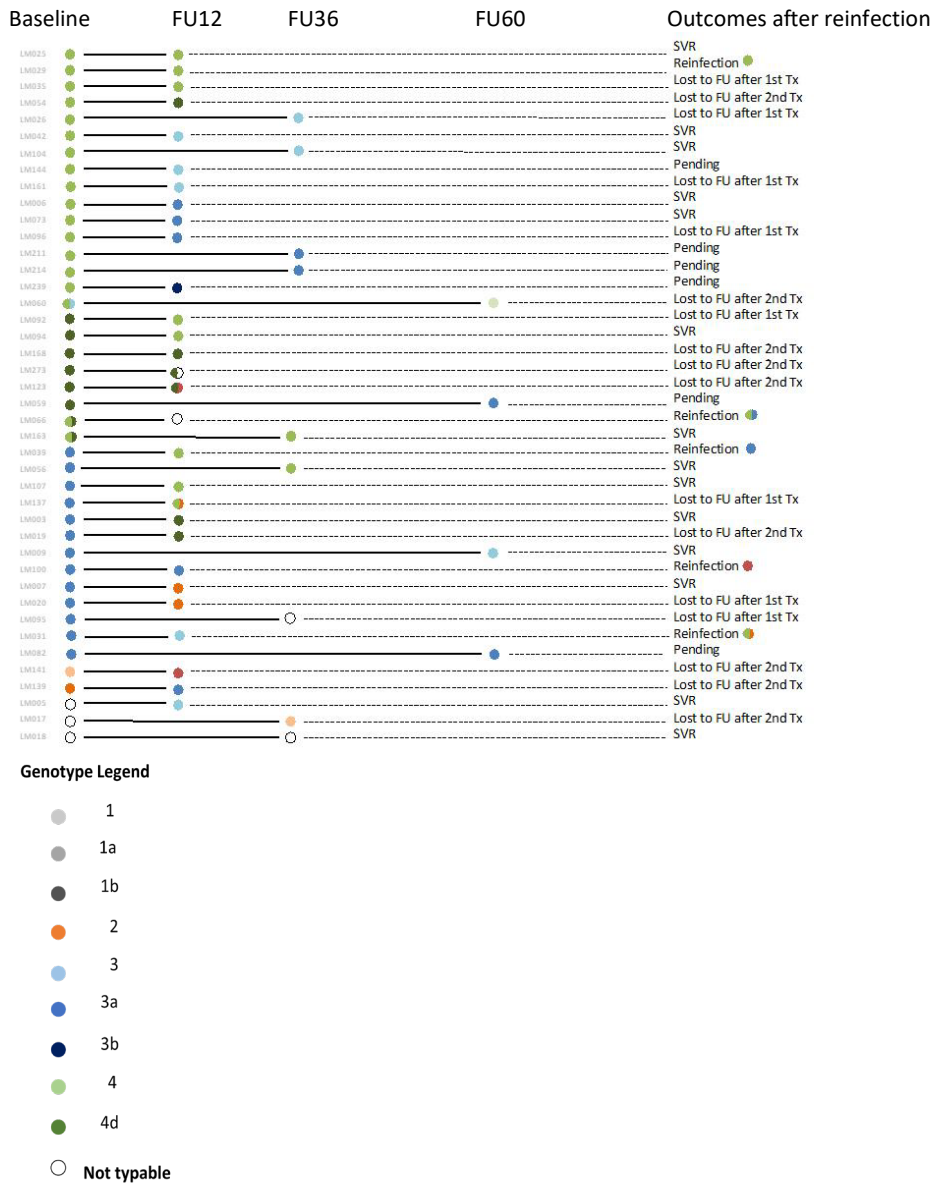

**Table S1.** Baseline differences among those accepting HCV screening or not.

| Variables               | Non-acceptance<br>n=499 | Acceptance<br>n=420 | p      |
|-------------------------|-------------------------|---------------------|--------|
| Age (years)             | 42 (36-48)              | 41 (35-48)          | 0.99   |
| Male                    | 460 (92)                | 372 (88)            | 0.12   |
| Foreign Nationality     | 243 (49)                | 192 (46)            | 0.38   |
| Homeless                | 78 (16)                 | 121 (29)            | <0.001 |
| Daily injected drug use | 217 (43)                | 300 (71)            | <0.001 |

**Table S2.** Differences in baseline and on-treatment characteristics among PWID receiving 12 week or 8 week treatment duration

| Variables                              | SOF/VEL<br>12 weeks<br>n= 97 | G/P<br>8 weeks<br>n=71 | p            |
|----------------------------------------|------------------------------|------------------------|--------------|
| Age (years)                            | 41 (35-49)                   | 40 (34-47)             | 0.19         |
| Male                                   | 89 (92)                      | 58 (82)                | 0.06         |
| Foreign Nationality                    | 44 (45)                      | 36 (51)                | 0.53         |
| Homeless                               | 30 (31)                      | 24 (34)                | 0.73         |
| Family support                         | 56 (58)                      | 42 (59)                | 0.95         |
| Educational level:                     |                              |                        |              |
| None                                   | 1 (1)                        | 3 (4)                  | 0.78         |
| Primary Education                      | 44 (45)                      | 27 (38)                |              |
| Secondary Education                    | 24 (25)                      | 19 (27)                |              |
| Highschool                             | 16 (6)                       | 7 (10)                 |              |
| University degree                      | 13 (13)                      | 9 (13)                 |              |
| Vocational training                    | 7 (7)                        | 5 (7)                  |              |
| Unemployment                           | 71 (73)                      | 52 (73)                | 0.97         |
| Previously incarcerated <sup>^</sup>   | 65 (67)                      | 39 (55)                | 0.16         |
| Drug injection frequency:              |                              |                        |              |
| >once/day                              | 57 (59)                      | 42 (59)                | 0.99         |
| Once/day                               | 12 (12)                      | 11 (15)                |              |
| Weekly                                 | 13 (13)                      | 14 (20)                |              |
| Less than weekly                       | 12 (12)                      | 2 (3)                  |              |
| None                                   | 3 (3)                        | 2 (3)                  |              |
| Current drug use:                      |                              |                        |              |
| Cocaine                                | 82 (84)                      | 63 (88)                | 0.41         |
| Heroin                                 | 82 (85)                      | 63 (88)                | 0.67         |
| Cannabis                               | 53 (54)                      | 40 (56)                | 0.97         |
| Speedball                              | 67 (69)                      | 49 (69)                | 0.48         |
| Syringe sharing <sup>^</sup>           | 18 (19)                      | 11 (16)                | 0.68         |
| Paraphernalia sharing <sup>^</sup>     | 38 (40)                      | 21 (30)                | 0.19         |
| Risk sexual relationships <sup>‡</sup> | 33 (34)                      | 30 (42)                | 0.32         |
| Alcohol consumption                    | 32 (33)                      | 27 (38)                | 0.79         |
| >28 Alcohol units/week                 | 11 (11)                      | 11 (15)                | 0.49         |
| Opioid substitution therapy            | 51 (53)                      | 35 (49)                | 0.75         |
| Concomitant medication <sup>^</sup> :  |                              |                        |              |
| Benzodiazepines                        | 39 (40)                      | 26 (36)                | 0.83         |
| Antidepressants                        | 19 (19)                      | 9 (12)                 | 0.22         |
| Antipsychotics                         | 14 (14)                      | 5 (7)                  | 0.20         |
| HIV+                                   | 28 (30)                      | 5 (7)                  | <b>0.001</b> |
| TARGA therapy among HIV+               | 17 (16)                      | 2 (3)                  | <b>0.003</b> |
| Previous HCV+ diagnosis                | 71 (73)                      | 52 (73)                | 0.99         |
| Previous HCV antiviral therapy         | 23 (24)                      | 6 (8)                  | <b>0.012</b> |
| HCV-RNA < 1000 IU/mL                   | 4 (4)                        | 7 (10)                 | 0.20         |
| Baseline Fibroscan <sup>®</sup> (kPa)  | 6.2 (4.9-8.4)                | 5.8 (4.8-7)            | 0.58         |
| Advanced fibrosis                      | 16 (16)                      | 3 (4)                  | <b>0.014</b> |
| Adherence assessment:                  |                              |                        |              |
| Daily                                  | 21 (23)                      | 21 (29)                | 0.18         |

|                                |              |               |              |
|--------------------------------|--------------|---------------|--------------|
| Weekly                         | 37 (41)      | 29 (42)       |              |
| Less than weekly               | 33 (36)      | 21 (29)       |              |
| Premature discontinuation      | 20 (22)      | 8 (11)        | 0.09         |
| % antiviral drug intake within |              |               |              |
| -Expected treatment duration   | 88 (64-97)   | 96 (78-100)   | <b>0.025</b> |
| -Total                         | 100 (84-100) | 100 (100-100) | <b>0.001</b> |
| Imprisonment during treatment  | 6 (7)        | 5 (7)         | 0.99         |
| Adverse Events                 | 4 (5)        | 5 (7)         | 0.50         |
| FU12 (n=148)                   |              |               |              |
| HCV-RNA neg                    | 48 (47)      | 41 (57)       | 0.41         |
| Relapse                        | 4 (3)        | 2 (3)         |              |
| Reinfection                    | 17 (13)      | 13 (18)       |              |
| Lost to follow-up              | 12 (13)      | 11 (15)       |              |

Qualitative variables are expressed as n (%) and quantitative variables median (P<sub>25</sub>-P<sub>75</sub>). P Values in bold denote statistical significance. TARGA: Antiretroviral therapy.

^n=165 †n=154 as the remaining PWID declined to answer or referred 'unknown'

**Table S3. Impact of antiviral therapy among those patients achieving SVR with paired analysis at baseline and FU12 (n=89).**

| Variables                   | Baseline | FU12    | p                |
|-----------------------------|----------|---------|------------------|
| Homeless                    | 24 (27)  | 28 (22) | <b>0.016</b>     |
| Family support              | 59 (66)  | 59 (66) | 0.99             |
| Unemployment                | 62 (69)  | 52 (58) | 0.64             |
| Daily vs non-daily          | 61 (69)  | 31 (35) | <b>&lt;0.001</b> |
| Drug injection frequency:   |          |         |                  |
| >once/day                   | 50 (56)  | 20 (22) | <b>&lt;0.001</b> |
| Once/day                    | 10 (11)  | 11 (12) |                  |
| Weekly                      | 15 (17)  | 15 (17) |                  |
| Less than weekly            | 11 (12)  | 32 (36) |                  |
| None                        | 3 (3)    | 11 (12) |                  |
| Syringe sharing             | 10 (11)  | 3 (3.4) | 0.22             |
| Paraphernalia sharing       | 29 (33)  | 12 (13) | <b>0.015</b>     |
| Risk sexual relationships   | 38 (43)  | 13 (14) | <b>0.001</b>     |
| Alcohol consumption         | 37 (41)  | 22(25)  | 0.09             |
| Opioid substitution therapy | 45 (51)  | 46 (52) | 0.28             |

P Values in bold denote statistical significance

**Table S4. Impact of antiviral therapy among those patients initiating antiviral therapy with paired analysis at baseline and FU36 (n=64).**

| Variables                              | Baseline | FU36    | p                |
|----------------------------------------|----------|---------|------------------|
| Homeless                               | 18 (28)  | 8 (13)  | <b>0.002</b>     |
| Family support                         | 42 (66)  | 46 (72) | 0.99             |
| Unemployment                           | 44 (69)  | 41 (xx) | 0.61             |
| Daily vs non-daily drug injection      | 46 (72)  | 26 (41) | <b>&lt;0.001</b> |
| Drug injection frequency:              |          |         |                  |
| >once/day                              | 38 (59)  | 11 (18) | <b>&lt;0.001</b> |
| Once/day                               | 8 (12)   | 12 (19) |                  |
| Weekly                                 | 10 (16)  | 11 (17) |                  |
| Less than weekly                       | 7 (11)   | 19 (29) |                  |
| None                                   | 1 (2)    | 11 (17) |                  |
| Syringe sharing <sup>^</sup>           | 4 (7)    | 0 (0)   | 0.04             |
| Paraphernalia sharing <sup>^</sup>     | 18 (31)  | 0 (0)   | <b>&lt;0.001</b> |
| Risk sexual relationships <sup>†</sup> | 24 (43)  | 13 (20) | <b>&lt;0.001</b> |

|                             |         |         |              |
|-----------------------------|---------|---------|--------------|
| Alcohol consumption         | 23 (45) | 14 (22) | <b>0.035</b> |
| Opioid substitution therapy | 33 (52) | 41 (64) | <b>0.039</b> |

P Values in bold denote statistical significance

^n=58, †n=53 as the remaining PWID declined to answer or referred 'unknown'
